# Supplementary material for: F-TiO2/P(VDF-HFP) hybrid films with enhanced dielectric permittivity and low dielectric loss
Source: Royal Society of Chemistry journal article supplement (doi:10.1039/c6ra26772f), 2017-01-01
Supplement: c6ra26772f1.pdf [file c6ra26772f1.pdf]

Electronic Supplementary Information

**F-TiO<sub>2</sub>/P (VDF-HFP) hybrid films with enhanced dielectric permittivity and low dielectric loss**

Enjie Yu, Qilong Zhang\*, Nuoxin Xu, and Hui Yang

*School of Materials Science and Engineering, State Key Lab Silicon Mat, Zhejiang University, Hangzhou 310027, PR China*

\* Corresponding author. E-mail: [mse237@zju.edu.cn](mailto:mse237@zju.edu.cn)

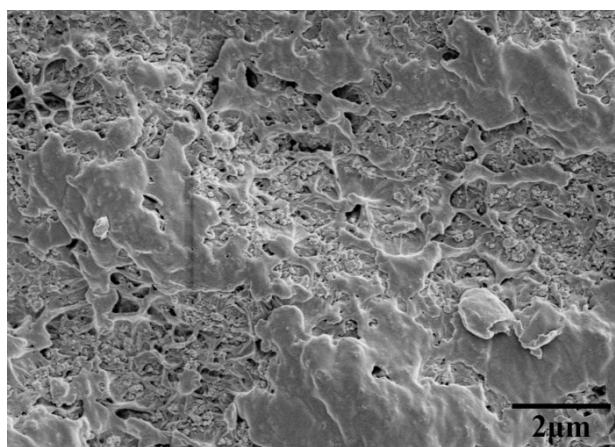

Fig. S1 High magnification SEM image of cross sections of composites with 20 vol % F-TiO<sub>2</sub> loading.

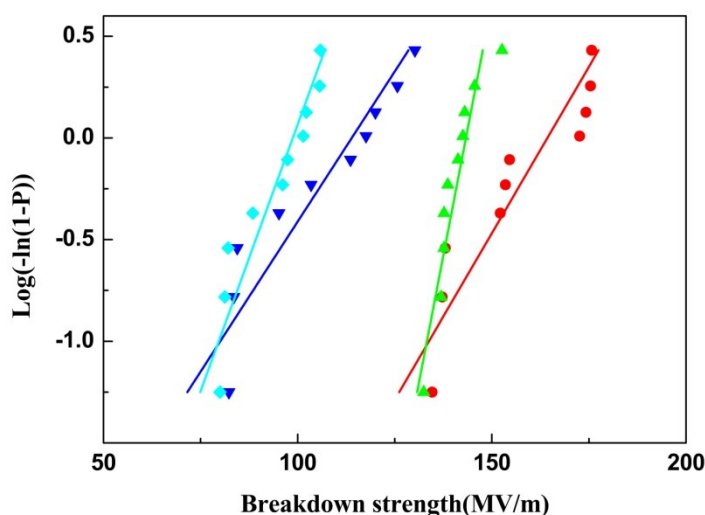

Fig. S2 Weibull plot of the breakdown strength of F-TiO<sub>2</sub>/ P(VDF-HFP) composites.

Tab. S1 Characteristic breakdown strength of F-TiO<sub>2</sub>/ P(VDF-HFP) composites.

| Sample | 5% F-TiO <sub>2</sub> / | 10% F-TiO <sub>2</sub> / P(VDF- | 15% F-TiO <sub>2</sub> / P(VDF- | 20% F-TiO <sub>2</sub> / P(VDF- |
|--------|-------------------------|---------------------------------|---------------------------------|---------------------------------|
|--------|-------------------------|---------------------------------|---------------------------------|---------------------------------|

|                           | <b>P(VDF-HFP)</b> | <b>HFP)</b> | <b>HFP)</b> | <b>HFP)</b> |
|---------------------------|-------------------|-------------|-------------|-------------|
| <b>Breakdown strength</b> | 163.17MV/m        | 143.50MV/m  | 113.54MV/m  | 98.78MV/m   |
